# Supplementary material for: The effect of graphene-nanoplatelets on gelation and structural integrity of a polyvinyltrimethoxysilane-based aerogel
Source: Royal Society of Chemistry journal article supplement (doi:10.1039/c9ra00994a), 2019-01-01
Supplement: c9ra00994a1.pdf [file c9ra00994a1.pdf]

## The Effect of Graphene-Nanoplatelet on Gelation and Structural Integrity of Polyvinyltrimethoxysilane-Based Aerogel

Solmaz Karamikamkar<sup>a,c</sup>, Abdelnasser Abidli<sup>a</sup>, Ehsan Behzadfar<sup>b</sup>, Sasan Rezaei<sup>a</sup>, Hani E. Naguib<sup>c</sup>, Chul B. Park<sup>a\*</sup>

<sup>a</sup>Microcellular Plastics Manufacturing Laboratory, Department of Mechanical and Industrial Engineering, University of Toronto, Toronto, Ontario M5S 3G8, Canada.

<sup>b</sup>Department of Chemical Engineering, Lakehead University, Thunder Bay, Ontario Canada P7B 5E1

<sup>c</sup>Smart Polymers & Composites Lab, Department of Mechanical and Industrial Engineering University of Toronto, Toronto, Ontario M5S 3G8, Canada.

\* Corresponding author: [park@mie.utoronto.ca](mailto:park@mie.utoronto.ca)

### Supporting information

#### XPS Characterization:

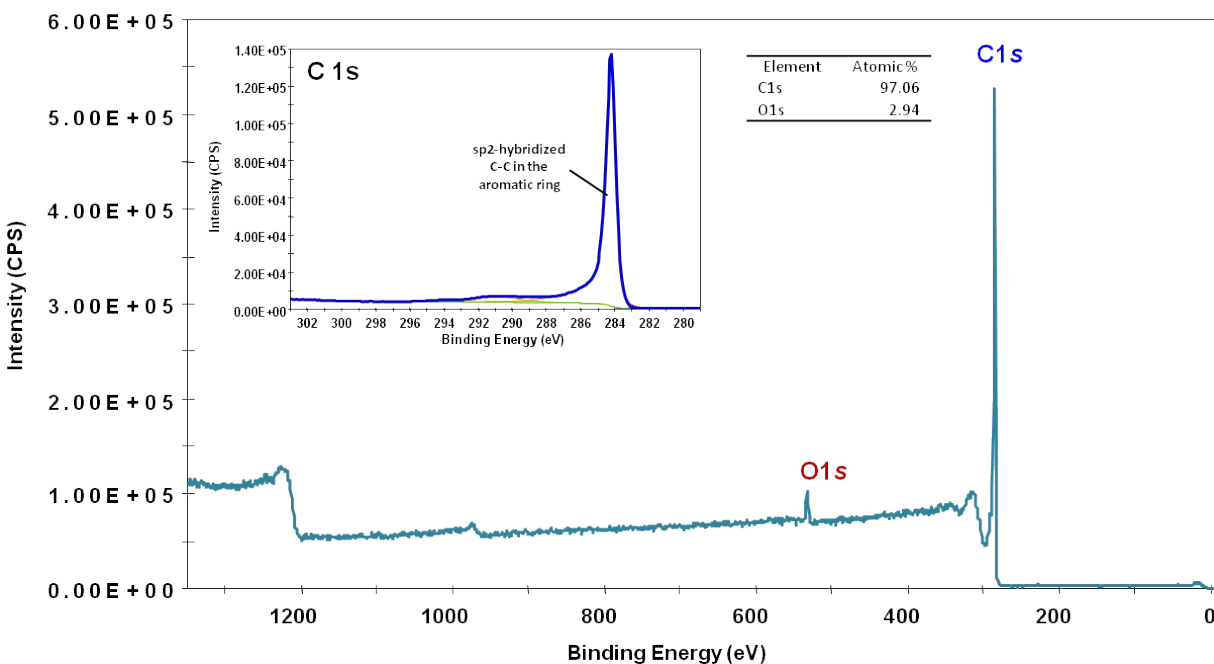

**Figure S1.** Survey XPS spectrum and C 1s core-level spectrum (decomposed by Lorentzian-Gaussian fitting) for the pristine graphene sample

## Pore size and surface characterization:

In the low  $p/p^0$  range, the Type V isotherm shape is very similar to our results for samples with and without GnP. The type V isotherms show pore condensation and hysteresis which is attributed to relatively weak adsorbent–adsorbate interactions.

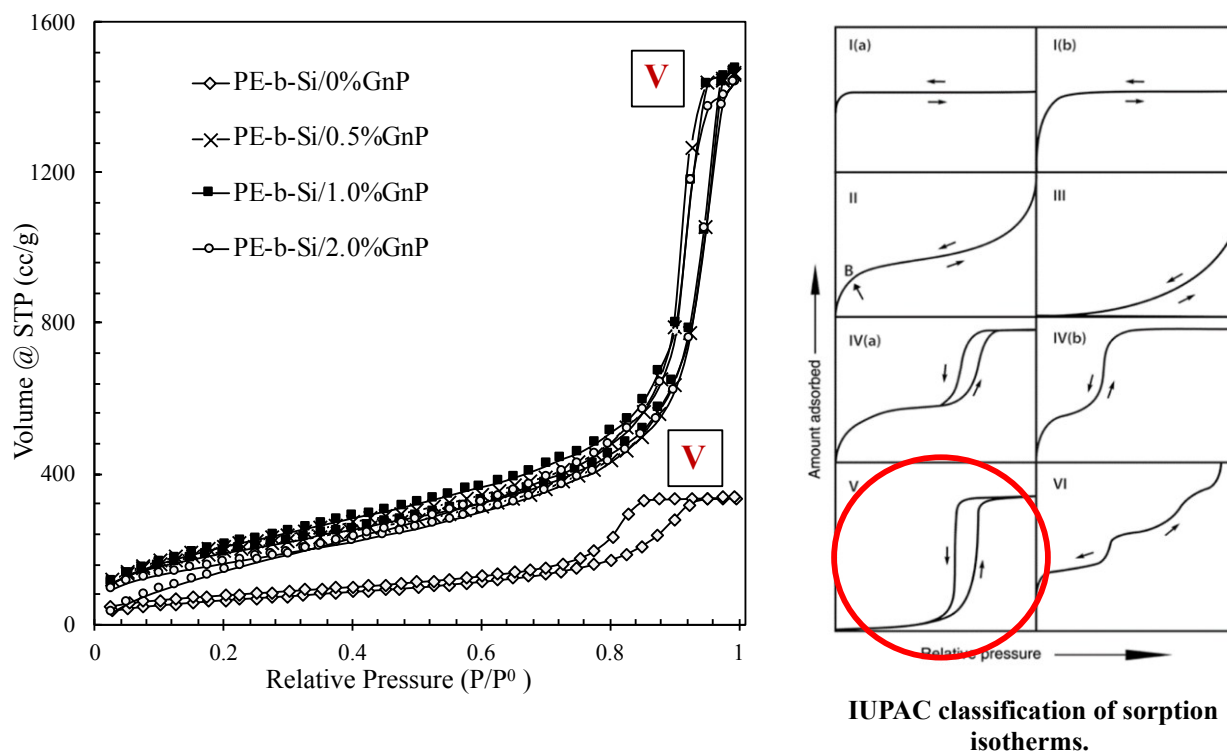

**Figure S2.** Nitrogen adsorption/desorption analysis for the PE-b-Si samples with various GnP content of 0-2wt%, Isotherms of N<sub>2</sub> at 77K.

**Table S1.** BJH, DFT analysis for pore diameter and surface areas of the PE-b-Si/GnP aerogel samples.

|                        | <sup>a</sup> S <sub>BJH</sub> (m <sup>2</sup> /g) | <sup>b</sup> d <sub>DFT</sub> , Dv(d) (nm) | <sup>c</sup> S <sub>DFT</sub> (m <sup>2</sup> /g) |
|------------------------|---------------------------------------------------|--------------------------------------------|---------------------------------------------------|
| <b>PE-b-Si/0%GnP</b>   | ---                                               | 25.50                                      | 859.159                                           |
| <b>PE-b-Si/0.5%GnP</b> | 530.81                                            | 26.43                                      | 655.09                                            |
| <b>PE-b-Si/1.0%GnP</b> | 579.99                                            | 40.17                                      | 659.41                                            |
| <b>PE-b-Si/2.0%GnP</b> | 636.96                                            | 40.19                                      | 643.06                                            |

<sup>a</sup>BJH surface area. <sup>b</sup>DFT pore diameter. <sup>c</sup>DFT specific surface area.

### Hydrophilicity/hydrophobicity observation:

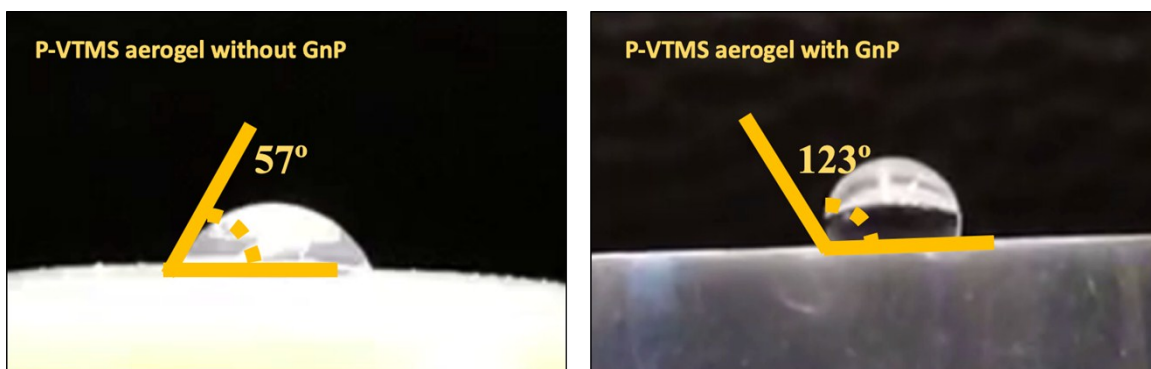

**Figure S3.** The droplet formation on PVTMS-based aerogel: left: The PVTMS-based aerogel without GnP, right: The PVTMS-based aerogel with GnP.

### Microstructure:

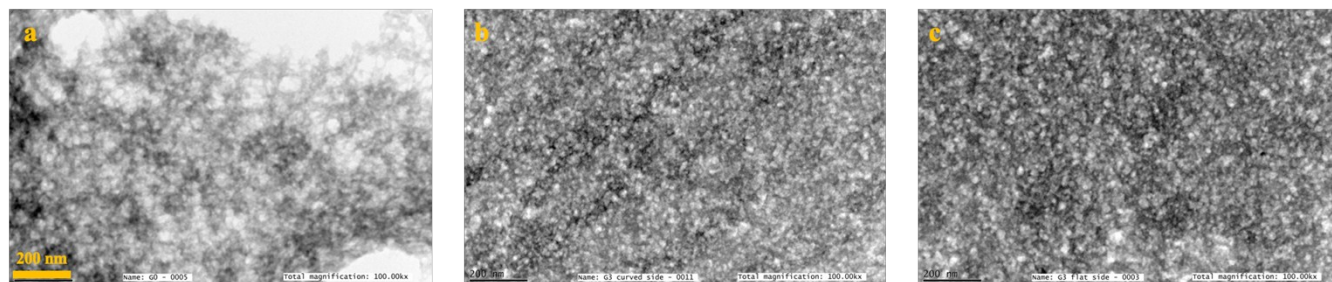

**Figure S4.** The TEM image of samples with and without GnP. (a) sample PE-b-Si/0%GnP, (b) the side view of sample PE-b-Si/2.0%GnP, (c) the cross-section view of PE-b-Si/2.0%GnP. The scale bar in all images represent 200 nm

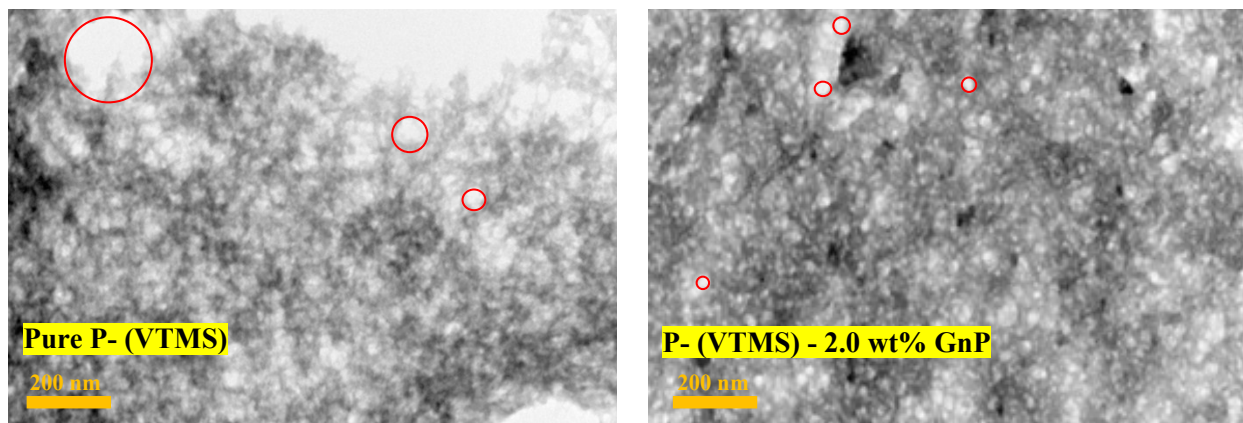

Figure S5. The TEM image of samples with and without GnP. (left) sample PE-b-Si/0%GnP, (right) sample PE-b-Si/2.0%GnP. The scale bar in all images represent 200 nm
